# Supplementary material for: Fluorocarbyne complexes via electrophilic fluorination of carbido ligands
Source: Royal Society of Chemistry journal article supplement (doi:10.1039/d3sc00261f), 2023-01-01
Supplement: d3sc00261f2.pdf [file d3sc00261f2.pdf]

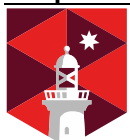

## CHEMICAL ANALYSIS FACILITY

---

Attn: Richard Manzano,  
Lachlan Watson  
Australian National University  
Research School of Chemistry  
Building 137, Sullivan's Creek road  
Acton, ACT

Email: [richard.manzano@anu.edu.au](mailto:richard.manzano@anu.edu.au)  
[lachlan.watson@anu.edu.au](mailto:lachlan.watson@anu.edu.au)  
[a.hill@anu.edu.au](mailto:a.hill@anu.edu.au)

From: Dr Nima Sayyadi  
Dr Remi Rouquette  
Chemical Analysis Facility  
School of Natural Sciences  
Macquarie University, NSW, 2109

Phone: +61 2 9850 4219  
Email: [nima.sayyadi@mq.edu.au](mailto:nima.sayyadi@mq.edu.au)  
Email: [remi.rouquette@mq.edu.au](mailto:remi.rouquette@mq.edu.au)

January 13<sup>th</sup> 2023

### Elemental Microanalysis Report

---

**Sample ID:** rm-075-2022

**Date Received:** December 16<sup>th</sup>, 2022

**Date Analysed:** January 10<sup>nd</sup>, 2023

| Sample ID          | Weight (mg) | N%    | C%    | H%   | S% |
|--------------------|-------------|-------|-------|------|----|
| rm-075-2022        | 1.804       | 17.44 | 45.02 | 4.17 |    |
|                    | 1.576       | 17.49 | 45.01 | 4.24 |    |
| Theoretical values |             | 17.5  | 45.02 | 4.62 | -  |

**Sample ID:** rm-77-2022

**Date Received:** December 16<sup>th</sup>, 2022

**Date Analysed:** January 10<sup>nd</sup>, 2023

| Sample ID          | Weight (mg) | N%   | C%    | H%   | S% |
|--------------------|-------------|------|-------|------|----|
| rm-77-2022         | 1.929       | 3.86 | 32.94 | 3.55 |    |
|                    | 2.019       | 3.81 | 32.69 | 3.54 |    |
| Theoretical values |             | 3.26 | 32.97 | 3.80 | -  |

**Sample ID:** rm-069-2022

**Date Received:** December 16<sup>th</sup>, 2022

**Date Analysed:** January 10<sup>nd</sup>, 2023

| Sample ID          | Weight (mg) | N%    | C%    | H%   | S% |
|--------------------|-------------|-------|-------|------|----|
| rm-69-2022         | 2.610       | 10.97 | 27.08 | 2.55 |    |
|                    | 2.574       | 10.91 | 27.03 | 2.57 |    |
| Theoretical values |             | 10.50 | 27.01 | 2.77 | -  |

**Sample ID:** LJW-RhCRh

**Date Received:** December 16<sup>th</sup>, 2022

**Date Analysed:** January 10<sup>nd</sup>, 2023

| Sample ID          | Weight (mg) | N%   | C%    | H%   | S% |
|--------------------|-------------|------|-------|------|----|
| LJW-RhCRh          | 1.211       | 2.57 | 64.35 | 4.52 |    |
|                    | 1.191       | 2.55 | 64.21 | 4.44 |    |
| Theoretical values |             | 2.03 | 64.41 | 4.53 | -  |

**Comments:**

- Sample was stored in a fridge before analysis.
- Values are expressed as grams of element per 100 grams of sample. For organic standard materials the trueness 95% confidence limit of the technique is  $\pm 0.3\%$  with a precision of  $\pm 0.2\%$ . Please note that the presence of water or other solvents, filter paper fibres or other foreign substances in the sample will result in appreciable deviations from the expected theoretical values.

**Dr. Remi Rouquette**

**Dr. Nima Sayyadi**

**Senior Analytical Scientist**

Macquarie Analytical & Fabrication Facility (MAFF)

School of Natural Sciences

Macquarie University, NSW, 2109
